# Supplementary material for: Analysis of Volatile Compounds in Pears by HS-SPME-GC×GC-TOFMS
Source: PubMed Central journal article supplement (PMC6539139; doi:10.3390/molecules24091795), 2019-05-09
Supplement: molecules-24-01795-s001.pdf [file molecules-24-01795-s001.pdf]

## Supplementary:

# Analysis of Volatile Compounds in Pears by HS-SPME-GC×GC-TOFMS

Chenchen Wang <sup>1,2</sup>, Wenjun Zhang <sup>1,2</sup>, Huidong Li <sup>1,2</sup>, Jiangsheng Mao <sup>1,2</sup>, Changying Guo <sup>1,2</sup>, Ruiyan Ding <sup>1,2</sup>, Ying Wang <sup>3</sup>, Liping Fang <sup>1,2</sup>, Zilei Chen <sup>1,2,4,\*</sup> and Guosheng Yang <sup>5,\*</sup>

**Table S1.** The peak numbers of different classes obtained using 4 SPME fibres.

|           | 50/30 μm     |          | 65 μm    |             |
|-----------|--------------|----------|----------|-------------|
|           | DVB/CAR/PDMS | 85 μm PA | PDMS/PVB | 100 μm PDMS |
| Esters    | 67           | 49       | 62       | 46          |
| Alkenes   | 19           | 3        | 27       | 12          |
| Alkanes   | 19           | 4        | 17       | 14          |
| Arenes    | 20           | 2        | 15       | 0           |
| Aldehydes | 9            | 6        | 10       | 2           |
| Ketones   | 5            | 2        | 4        | 4           |
| Alcohols  | 9            | 7        | 7        | 4           |
| Others    | 15           | 8        | 4        | 2           |
| Total     | 163          | 81       | 146      | 84          |

**Table S2.** Concentrations of volatile compounds in pear cultivars.

| No.    | Volatile compounds       | <sup>1</sup> R.T. (s) | <sup>2</sup> RI | Longyuanyang<br>li (ng/g) | Packham<br>(ng/g) | D Jules<br>(ng/g) | Clapp<br>(ng/g) | Stark<br>(ng/g) |
|--------|--------------------------|-----------------------|-----------------|---------------------------|-------------------|-------------------|-----------------|-----------------|
| Esters |                          |                       |                 |                           |                   |                   |                 |                 |
| (101)  |                          |                       |                 |                           |                   |                   |                 |                 |
| 1      | Methyl acetate           | 102, 0.630            | 500.4           | <sup>3</sup> 16.22±0.56   | 19.70±3.48        | 13.97±5.44        | 13.85±10.19     | 14.30±0.32      |
| 2      | Ethyl Acetate            | 132, 0.810            | 605.1           | 66.94±11.81               | 10.81±5.74        | 58.90±22.34       | 48.3±0.79       | 39.44±41.09     |
| 3      | Methyl propionate        | 138, 0.760            | 614.6           | 1.55±0.14                 | <sup>4</sup> -    | -                 | -               | -               |
| 4      | Ethyl propanoate         | 198, 0.900            | 705.3           | 16.64±5.85                | -                 | -                 | -               | -               |
| 5      | n-Propyl acetate         | 201, 0.920            | 707.9           | 111.27±3.60               | 2.87±1.91         | 95.40±19.72       | 24.73±1.23      | 59.64±0.42      |
| 6      | Methyl butanoate         | 210, 0.930            | 715.6           | 11.59±1.77                | 0.35±0.13         | -                 | -               | 0.08±0.02       |
| 7      | Ethyl-2-methylproanoate  | 255, 0.930            | 754.0           | 0.94±0.70                 | -                 | -                 | -               | -               |
| 8      | Methyl (E)-2-butenate    | 261, 1.120            | 759.4           | 0.69±0.08                 | -                 | -                 | -               | -               |
| 9      | Methyl 2-butenate        | 264, 1.110            | 761.9           | -                         | -                 | -                 | -               | 0.03±0.01       |
| 10     | 2-Methylpropyl acetate   | 273, 0.970            | 769.4           | 8.43±0.61                 | 0.46±0.29         | 5.48±0.75         | 3.66±0.17       | 3.64±0.30       |
| 11     | Methyl 2-methylbutanoate | 279, 0.980            | 774.6           | 2.62±0.27                 | 0.49±0.03         | 0.26±0.04         | 0.50±0.09       | 0.35±0.08       |
| 12     | Ethyl butyrate           | 312, 1.080            | 802.0           | 36.37±6.88                | -                 | -                 | -               | -               |
| 13     | Butyl acetate            | 330, 1.130            | 812.7           | 75.90±53.77               | 54.69±15.25       | 17.46±21.05       | 39.93±9.65      | 8.90±4.98       |

|    |                                  |            |        |             |            |            |             |            |
|----|----------------------------------|------------|--------|-------------|------------|------------|-------------|------------|
| 14 | Methyl valerate                  | 348, 1.100 | 823.4  | 0.73±0.08   | -          | -          | -           | -          |
| 15 | Ethyl (Z)-2-butenolate           | 381, 1.250 | 843.1  | 3.66±0.22   | -          | -          | -           | -          |
| 16 | Ethyl 2-methylbutyrate           | 390, 1.080 | 848.3  | 18.01±4.15  | 0.05±0.01  | 0.12±0.05  | 0.13±0.04   | -          |
| 17 | 2-Methyl-1-butyl acetate         | 441, 1.130 | 878.8  | 60.23±2.89  | -          | 8.21±1.02  | 5.19±0.39   | 4.32±0.33  |
| 18 | 3-Buten-1-ol, 3-methyl-, acetate | 450, 1.200 | 884.2  | 0.07±0.01   | -          | -          | -           | 0.19±0.12  |
| 19 | Propyl butanoate                 | 474, 1.140 | 898.4  | 1.50±0.02   | -          | -          | -           | -          |
| 20 | Ethyl pentanoate                 | 477, 1.160 | 900.2  | 0.83±0.11   | -          | -          | -           | -          |
| 21 | Butyl propanoate                 | 492, 1.160 | 908.4  | 0.08±0.01   | -          | 0.37±0.08  | 0.36±0.08   | 0.26±0.02  |
| 22 | Pentyl acetate                   | 504, 1.190 | 915.0  | 68.9±4.11   | 7.08±5.82  | 24.91±7.19 | 21.47±3.87  | 21.54±2.02 |
| 23 | Butyrolactone                    | 513, 2.620 | 920.7  | 0.22±0.21   | -          | 1.86±0.06  | -           | -          |
| 24 | Methyl hexanoate                 | 522, 1.230 | 924.8  | 80.75±13.36 | 1.02±0.27  | 0.53±0.12  | 0.61±0.07   | 1.25±0.17  |
| 25 | Methyl (E)-3-hexenoate           | 537, 1.290 | 933.0  | 0.05±0.01   | -          | -          | -           | -          |
| 26 | Methyl (Z)-3-hexenoate           | 543, 1.320 | 936.3  | 0.08±0.01   | -          | -          | -           | -          |
| 27 | Ethyl tiglate                    | 549, 1.310 | 939.6  | 0.19±0.02   | -          | -          | -           | -          |
| 28 | Propyl 2-methylbutanoate         | 561, 1.130 | 946.1  | 0.55±0.12   | -          | -          | -           | -          |
| 29 | Butyl 2-methylpropanoate         | 576, 1.120 | 954.3  | -           | -          | -          | 0.18±0.04   | 0.06±0.01  |
| 30 | 2-Methylpropyl butyrate          | 579, 1.140 | 955.9  | 0.12±0.00   | -          | -          | -           | -          |
| 31 | Methyl 2-hexenoate               | 597, 1.360 | 965.9  | 0.28±0.10   | -          | -          | -           | -          |
| 32 | 2-Methylpentyl acetate           | 624, 1.180 | 980.5  | -           | -          | -          | -           | 0.67±0.09  |
| 33 | Vinyl caproate                   | 633, 1.270 | 985.5  | 0.12±0.04   | -          | -          | -           | -          |
| 34 | Butyl butyrate                   | 654, 1.190 | 996.9  | 0.46±0.05   | 0.06±0.04  | 0.68±0.09  | 3.35±0.77   | 1.84±0.27  |
| 35 | Ethyl hexanoate                  | 660, 1.270 | 1000.2 | 37.76±1.82  | -          | 0.06±0.01  | 0.08±0.02   | 0.12±0.02  |
| 36 | Isobutyl 2-methylbutanoate       | 669, 1.100 | 1005.0 | -           | -          | 0.02±0.01  | 0.18±0.02   | 0.01±0.00  |
| 37 | (Z)-3-Hexenol acetate            | 672, 1.280 | 1006.7 | 5.41±0.38   | 1.03±0.13  | 8.51±0.56  | 10.98±0.30  | 6.02±3.89  |
| 38 | Ethyl (E)-3-hexenoate            | 681, 1.310 | 1011.5 | 0.74±0.05   | -          | -          | -           | -          |
| 39 | Hexyl acetate                    | 690, 1.370 | 1016.3 | 9.99±8.97   | 51.58±7.86 | 49.52±38.9 | 44.32±11.96 | 5.26±3.59  |
| 40 | (Z)-2-Hexenyl acetate            | 693, 1.360 | 1018.0 | 3.65±2.01   | 11.46±6.36 | 2.66±2.61  | 11.99±0.98  | 16.84±2.18 |
| 41 | Methyl 2,4-hexadienoate          | 693, 1.590 | 1018.1 | 0.28±0.08   | -          | -          | -           | -          |
| 42 | (Z)-4-Hexen-1-ol acetate         | 702, 1.320 | 1024.4 | -           | -          | 0.74±0.07  | 0.85±0.07   | 0.56±0.03  |
| 43 | Methyl heptanoate                | 708, 1.240 | 1026.0 | 1.31±0.18   | 0.05±0.01  | -          | 0.15±0.02   | 0.24±0.02  |
| 44 | Butyl 2-methylbutanoate          | 741, 1.160 | 1043.7 | 0.25±0.07   | -          | 0.41±0.11  | 3.43±1.45   | 0.84±0.22  |
| 45 | Ethyl 2-hexenoate                | 744, 1.380 | 1045.4 | 0.51±0.07   | -          | -          | -           | -          |
| 46 | 2-Methylbutyl butanoate          | 771, 1.180 | 1059.8 | 0.31±0.04   | -          | -          | 0.06±0.01   | -          |
| 47 | 1-Hexanol, 4-methyl-, acetate    | 816, 1.220 | 1084.0 | 0.18±0.02   | -          | 0.07±0.05  | -           | 0.19±0.03  |
| 48 | (E,E)-Ethyl 2,4-hexadienoate     | 834, 1.560 | 1093.9 | 0.32±0.05   | -          | -          | -           | -          |
| 49 | Butyl pentanoate                 | 834, 1.240 | 1093.7 | -           | -          | -          | 0.10±0.01   | -          |
| 50 | Propyl hexanoate                 | 837, 1.240 | 1095.3 | 0.96±0.21   | -          | 0.03±0.00  | -           | 0.10±0.00  |
| 51 | Methyl benzoate                  | 840, 1.850 | 1097.3 | 0.16±0.02   | -          | -          | 0.05±0.01   | 0.14±0.07  |
| 52 | Ethyl heptanoate                 | 843, 1.240 | 1098.6 | 1.17±0.12   | -          | -          | -           | -          |
| 53 | Ethyl                            | 849, 1.730 | 1102.2 | 0.12±0.02   | -          | -          | -           | -          |

|    |                                       |             |        |            |           |             |           |            |  |
|----|---------------------------------------|-------------|--------|------------|-----------|-------------|-----------|------------|--|
|    | 3-(methylsulfanyl)propanoate          |             |        |            |           |             |           |            |  |
| 54 | 2-Methylbutyl 2-methylbutanoate       | 855, 1.160  | 1105.2 | -          | -         | -           | 0.20±0.04 | -          |  |
| 55 | 3-Hepten-1-ol, acetate                | 855, 1.330  | 1105.2 | -          | -         | -           | -         | 0.22±0.04  |  |
| 56 | Hexyl propanoate                      | 858, 1.230  | 1107.0 | -          | -         | -           | 1.53±0.28 | 0.83±0.30  |  |
| 57 | Heptyl acetate                        | 870, 1.260  | 1113.7 | 20.98±3.38 | 0.07±0.04 | 39.82±6.28  | 9.68±0.17 | 21.38±6.14 |  |
| 58 | methyl 4-octenoate                    | 876, 1.350  | 1117.2 | 0.47±0.12  | -         | -           | 0.05±0.00 | 0.09±0.01  |  |
| 59 | Methyl octanoate                      | 891, 1.280  | 1125.6 | 5.16±1.11  | 0.07±0.00 | 0.23±0.04   | 1.12±0.09 | 3.45±0.72  |  |
| 60 | 3-(Methylthio)propyl acetate          | 891, 1.810  | 1125.9 | 0.27±0.03  | -         | 0.48±0.02   | -         | -          |  |
| 61 | Methyl (Z)-3-octenoate                | 900, 1.380  | 1130.8 | 0.03±0.01  | -         | -           | -         | -          |  |
| 62 | Hexyl 2-methylpropionate              | 933, 1.180  | 1149.3 | -          | -         | -           | 0.15±0.04 | -          |  |
| 63 | 2-Methylpropyl hexanoate              | 936, 1.200  | 1151.0 | 0.13±0.07  | -         | -           | 0.07±0.01 | -          |  |
| 64 | 3-Methylheptyl acetate                | 936, 1.200  | 1152.7 | -          | -         | 0.37±0.05   | -         | 1.05±0.31  |  |
| 65 | Methyl (E)-2-octenoate                | 969, 1.420  | 1169.8 | 0.20±0.11  | -         | -           | -         | 0.03±0.01  |  |
| 66 | Ethyl benzoate                        | 975, 1.800  | 1173.4 | 0.07±0.00  | -         | -           | -         | -          |  |
| 67 | Methyl benzeneacetate                 | 987, 2.000  | 1180.3 | 0.11±0.02  | -         | -           | -         | -          |  |
| 68 | Ethyl 3-(methylthio)-(E)-2-propenoate | 990, 1.970  | 1181.9 | 0.08±0.00  | -         | -           | -         | -          |  |
| 69 | (Z)-3-Hexenyl butanoate               | 999, 1.320  | 1186.6 | -          | -         | -           | 0.09±0.00 | -          |  |
| 70 | (Z)-Ethyl 4-octenoate                 | 1005, 1.350 | 1190.1 | 0.97±0.26  | -         | -           | -         | -          |  |
| 71 | Hexyl butanoate                       | 1008, 1.260 | 1191.7 | 1.43±0.41  | 0.07±0.05 | 5.96±1.20   | 9.05±1.54 | 3.97±1.31  |  |
| 72 | Butanoic acid, 2-hexenyl ester, (Z)-  | 1014, 1.350 | 1195.1 | -          | -         | -           | 0.49±0.00 | 0.32±0.13  |  |
| 73 | Ethyl octanoate                       | 1020, 1.260 | 1198.5 | 8.26±2.05  | -         | 0.09±0.01   | 0.24±0.05 | 0.43±0.15  |  |
| 74 | (Z)-3-Octen-1-ol acetate              | 1020, 1.330 | 1198.5 | -          | -         | 0.79±0.13   | -         | 0.11±0.01  |  |
| 75 | Cyclohexylethyl acetate               | 1038, 1.370 | 1209.2 | 0.87±0.17  | -         | 13.44±5.08  | 1.32±0.09 | 3.72±0.74  |  |
| 76 | Octyl acetate                         | 1044, 1.270 | 1212.7 | 1.04±0.33  | -         | 23.94±10.88 | 5.24±1.18 | 14.46±5.34 |  |
| 77 | Methyl nonanoate                      | 1065, 1.280 | 1225.2 | -          | -         | -           | 0.05±0.02 | -          |  |
| 78 | Hexyl 2-methylbutanoate               | 1086, 1.210 | 1237.6 | 0.42±0.15  | 0.03±0.00 | 0.21±0.03   | 0.55±0.12 | 0.21±0.08  |  |
| 79 | Hexyl 2-methyl-2-propenoate           | 1095, 1.410 | 1243.1 | -          | -         | -           | 0.02±0.00 | 0.04±0.01  |  |
| 80 | Ethyl (E)-2-octenoate                 | 1101, 1.410 | 1246.7 | 1.42±0.39  | -         | -           | -         | -          |  |
| 81 | trans, trans-Octa-2,4-dienyl acetate  | 1101, 1.500 | 1246.7 | -          | -         | 0.25±0.05   | 0.18±0.01 | 0.27±0.12  |  |
| 82 | Ethyl benzeneacetate                  | 1101, 1.910 | 1247.0 | 0.32±0.03  | -         | -           | -         | -          |  |
| 83 | 2-Methylbutyl hexanoate               | 1113, 1.240 | 1253.7 | 0.16±0.04  | -         | 0.03±0.00   | 0.11±0.01 | 0.03±0.01  |  |
| 84 | 2-Phenethyl acetate                   | 1122, 1.900 | 1259.5 | 0.39±0.08  | -         | 0.18±0.01   | -         | 0.02±0.01  |  |
| 85 | Hexyl n-valerate                      | 1173, 1.260 | 1289.5 | -          | -         | 0.05±0.01   | 0.27±0.23 | 0.08±0.02  |  |
| 86 | Propyl octanoate                      | 1179, 1.260 | 1293.0 | -          | -         | -           | -         | 0.06±0.03  |  |
| 87 | Methyl (Z)-4-decenoate                | 1206, 1.370 | 1309.9 | 0.04±0.01  | 0.04±0.03 | -           | 0.01±0.00 | 0.02±0.01  |  |

|         |                                         |             |        |           |           |           |           |           |
|---------|-----------------------------------------|-------------|--------|-----------|-----------|-----------|-----------|-----------|
| 88      | Methyl decanoate                        | 1230, 1.290 | 1325.2 | 0.12±0.03 | 0.10±0.08 | 0.23±0.07 | 0.09±0.01 | 0.19±0.08 |
| 89      | 6-Octen-1-ol, 3,7-dimethyl-, acetate    | 1275, 1.340 | 1354.1 | -         | -         | 0.14±0.01 | -         | -         |
| 90      | Butyl benzoate                          | 1311, 1.750 | 1377.4 | -         | -         | -         | 0.01±0.00 | -         |
| 91      | Hexyl hexoate                           | 1326, 1.270 | 1386.7 | 0.25±0.08 | -         | 1.63±0.32 | 8.13±3.39 | 2.55±1.55 |
| 92      | Ethyl decanoate                         | 1341, 1.270 | 1396.3 | 0.11±0.03 | -         | -         | -         | -         |
| 93      | Methyl (E,Z)-2,4-decadienoate           | 1344, 1.510 | 1398.4 | 0.09±0.02 | 0.53±0.32 | -         | -         | -         |
| 94      | Decyl acetate                           | 1365, 1.270 | 1412.2 | -         | -         | 0.37±0.12 | -         | -         |
| 95      | Ethyl (E,Z)-2,4-decadienoate            | 1452, 1.490 | 1470.3 | 0.12±0.04 | 0.05±0.05 | -         | -         | -         |
| 96      | Methyl dodecanoate                      | 1533, 1.290 | 1525.7 | -         | -         | 0.22±0.08 | 0.15±0.03 | 0.34±0.16 |
| 97      | Hexyl octylate                          | 1614, 1.280 | 1583.2 | -         | -         | -         | 0.11±0.05 | 0.05±0.02 |
| 98      | Methyl (6E)-6-nonenoate                 | 1770, 1.380 | 1698.0 | -         | -         | 0.09±0.03 | -         | -         |
| 99      | Methyl tetradecanoate                   | 1806, 1.300 | 1726.4 | 0.03±0.01 | -         | 0.09±0.03 | -         | 0.13±0.05 |
| 100     | Methyl hexadecanoate                    | 2052, 1.110 | 1933.5 | 0.04±0.01 | -         | 0.12±0.05 | 0.16±0.06 | 0.12±0.05 |
| 101     | Methyl (Z)-9-octadecenoate              | 2181, 0.840 | 2063.8 | 0.03±0.02 | -         | 0.04±0.03 | 0.02±0.01 | 0.03±0.03 |
|         | Subtotal                                |             |        | 692.72    | 162.66    | 378.94    | 273.54    | 241.03    |
| Alkenes |                                         |             |        |           |           |           |           |           |
| (30)    |                                         |             |        |           |           |           |           |           |
| 102     | 1,4-Pentadiene                          | 108, 0.580  | 522.4  | -         | 0.23±0.05 | -         | 0.17±0.03 | 0.14±0.02 |
| 103     | (Z),(Z)-2,4-Hexadiene                   | 144, 0.660  | 623.9  | -         | 0.28±0.11 | -         | -         | -         |
| 104     | 1-Methyl-1,4-cyclohexadiene             | 255, 0.880  | 754.0  | -         | -         | 0.28±0.12 | -         | 0.08±0.01 |
| 105     | Styrene                                 | 459, 1.370  | 891.4  | 0.46±0.03 | -         | 0.29±0.06 | 0.06±0.02 | 0.08±0.01 |
| 106     | β-myrcene                               | 645, 1.060  | 991.9  | 0.02±0.00 | -         | -         | -         | -         |
| 107     | L-Limonene                              | 714, 1.140  | 1030.8 | 0.31±0.03 | -         | -         | -         | -         |
| 108     | 1-Propenylbenzene                       | 729, 1.550  | 1037.5 | 0.13±0.01 | -         | -         | -         | -         |
| 109     | (Z)-β-ocimene                           | 753, 1.130  | 1050.1 | -         | -         | 0.03±0.00 | -         | -         |
| 110     | 1-Ethenyl-3-ethylbenzene                | 822, 1.460  | 1087.4 | 0.06±0.02 | -         | 0.24±0.08 | 0.05±0.01 | -         |
| 111     | 1-Ethenyl-4-ethylbenzene                | 834, 1.480  | 1093.8 | 0.17±0.09 | -         | 0.26±0.04 | 0.06±0.00 | 0.07±0.01 |
| 112     | 1,3-Diethenylbenzene                    | 873, 1.610  | 1115.6 | -         | -         | 0.07±0.02 | -         | -         |
| 113     | 1,4-Diethenyl benzene                   | 894, 1.660  | 1127.5 | 0.02±0.00 | -         | 0.06±0.01 | -         | -         |
| 114     | (Z)-3-Tetradecene                       | 1176, 1.010 | 1291.1 | -         | -         | 0.04±0.01 | -         | -         |
| 115     | α-Cubenene                              | 1275, 1.180 | 1354.0 | -         | 0.01±0.00 | -         | 0.09±0.03 | -         |
| 116     | Copaene                                 | 1320, 1.240 | 1382.8 | -         | 0.39±0.05 | 0.26±0.02 | -         | 0.05±0.02 |
| 117     | 1-Tetradecene                           | 1335, 1.040 | 1396.2 | -         | -         | 0.06±0.03 | -         | -         |
| 118     | Aromandendrene                          | 1368, 1.370 | 1414.2 | 0.07±0.02 | -         | -         | 0.03±0.00 | -         |
| 119     | (5Z)-2,6,10-Trimethyl-1,5,9-undecatrien | 1431, 1.170 | 1456.1 | -         | -         | 0.14±0.03 | -         | -         |
| 120     | (E)-β-Farnesene                         | 1437, 1.240 | 1460.1 | 0.34±0.03 | -         | 0.39±0.06 | 0.11±0.01 | 0.10±0.05 |
| 121     | α-Humulene                              | 1440, 1.410 | 1462.3 | -         | 0.02±0.00 | -         | 0.04±0.01 | -         |
| 122     | 2,3,5,8-Tetramethyl-1,5,9-de            | 1446, 1.190 | 1466.1 | 0.16±0.03 | -         | 0.27±0.10 | -         | -         |

|         |                             |             |        |                   |                 |                  |                  |                  |
|---------|-----------------------------|-------------|--------|-------------------|-----------------|------------------|------------------|------------------|
|         | catriene                    |             |        |                   |                 |                  |                  |                  |
| 123     | (Z,E)- $\alpha$ -Farnesene  | 1494, 1.290 | 1498.2 | 3.64 $\pm$ 1.41   | -               | 5.50 $\pm$ 0.96  | 0.73 $\pm$ 0.04  | 1.02 $\pm$ 0.28  |
| 124     | $\alpha$ -Muurolene         | 1506, 1.400 | 1506.7 | -                 | 0.07 $\pm$ 0.00 | 0.02 $\pm$ 0.00  | -                | -                |
| 125     | $\alpha$ -Farnesene         | 1518, 1.350 | 1512.9 | 15.78 $\pm$ 12.87 | 0.04 $\pm$ 0.03 | 15.07 $\pm$ 3.89 | 15.10 $\pm$ 2.94 | 17.47 $\pm$ 2.99 |
| 126     | (Z,Z)- $\alpha$ -Farnesene  | 1539, 1.290 | 1530.0 | 1.18 $\pm$ 0.70   | -               | 0.23 $\pm$ 0.03  | 0.08 $\pm$ 0.07  | 0.09 $\pm$ 0.06  |
| 127     | (+)- $\delta$ -Cadinene     | 1539, 1.420 | 1530.1 | -                 | 0.10 $\pm$ 0.00 | 0.16 $\pm$ 0.02  | 0.15 $\pm$ 0.05  | 0.04 $\pm$ 0.02  |
| 128     | cis-Calamenene              | 1539, 1.570 | 1530.1 | -                 | 0.02 $\pm$ 0.00 | -                | -                | -                |
| 129     | $\alpha$ -Calacorene        | 1569, 1.670 | 1551.5 | -                 | 0.01 $\pm$ 0.00 | 0.03 $\pm$ 0.00  | -                | -                |
| 130     | (E)- $\gamma$ -Bisabolene   | 1578, 1.340 | 1557.7 | 0.55 $\pm$ 0.21   | -               | 0.36 $\pm$ 0.05  | 0.08 $\pm$ 0.01  | 0.07 $\pm$ 0.00  |
| 131     | (Z)- $\gamma$ -Bisabolene   | 1602, 1.360 | 1574.7 | 0.64 $\pm$ 0.25   | -               | 0.37 $\pm$ 0.04  | 0.10 $\pm$ 0.01  | 0.09 $\pm$ 0.02  |
|         | Subtotal                    |             |        | 23.53             | 1.17            | 24.13            | 16.85            | 19.3             |
| Alkanes |                             |             |        |                   |                 |                  |                  |                  |
|         | (12)                        |             |        |                   |                 |                  |                  |                  |
| 132     | Undecane                    | 846, 0.890  | 1100.0 | 0.06 $\pm$ 0.02   | 0.05 $\pm$ 0.01 | 0.78 $\pm$ 0.18  | 0.04 $\pm$ 0.01  | 0.06 $\pm$ 0.00  |
| 133     | Dodecane                    | 1023, 0.930 | 1200.0 | 0.17 $\pm$ 0.04   | -               | 0.19 $\pm$ 0.04  | 0.05 $\pm$ 0.00  | 0.06 $\pm$ 0.01  |
| 134     | 2-Methyldodecane            | 1131, 0.930 | 1264.3 | 0.07 $\pm$ 0.02   | -               | 0.04 $\pm$ 0.01  | -                | -                |
| 135     | Tridecane                   | 1191, 0.960 | 1300.0 | 0.91 $\pm$ 0.26   | 0.05 $\pm$ 0.01 | 0.55 $\pm$ 0.17  | 0.15 $\pm$ 0.04  | 0.16 $\pm$ 0.02  |
| 136     | 2-Methyltridecane           | 1290, 0.960 | 1363.4 | 0.24 $\pm$ 0.07   | -               | 0.12 $\pm$ 0.02  | -                | -                |
| 137     | 3-Methyltridecane           | 1302, 0.970 | 1371.1 | 0.24 $\pm$ 0.06   | -               | 0.12 $\pm$ 0.03  | 0.03 $\pm$ 0.01  | 0.03 $\pm$ 0.00  |
| 138     | Tetradecane                 | 1347, 0.980 | 1400.0 | 1.87 $\pm$ 0.67   | 0.17 $\pm$ 0.04 | 1.54 $\pm$ 0.22  | 0.58 $\pm$ 0.17  | 0.43 $\pm$ 0.13  |
| 139     | 3-Methyltetradecane         | 1455, 0.990 | 1472.0 | 0.16 $\pm$ 0.04   | -               | -                | -                | -                |
| 140     | Pentadecane                 | 1497, 1.000 | 1500.0 | 0.88 $\pm$ 0.32   | 0.13 $\pm$ 0.07 | 1.91 $\pm$ 0.55  | 0.33 $\pm$ 0.03  | 0.36 $\pm$ 0.08  |
| 141     | 2-Methylpentadecane         | 1587, 0.990 | 1563.8 | 0.16 $\pm$ 0.06   | -               | -                | 0.05 $\pm$ 0.00  | -                |
| 142     | Hexadecane                  | 1638, 1.010 | 1600.0 | 0.65 $\pm$ 0.21   | 0.06 $\pm$ 0.03 | 0.81 $\pm$ 0.20  | 0.22 $\pm$ 0.02  | 0.19 $\pm$ 0.06  |
| 143     | Heptadecane                 | 1773, 1.020 | 1700.0 | 0.12 $\pm$ 0.05   | -               | 0.15 $\pm$ 0.04  | 0.05 $\pm$ 0.01  | 0.11 $\pm$ 0.02  |
|         | Subtotal                    |             |        | 5.53              | 0.46            | 6.21             | 1.5              | 1.4              |
| Arenes  |                             |             |        |                   |                 |                  |                  |                  |
|         | (19)                        |             |        |                   |                 |                  |                  |                  |
| 144     | Benzene                     | 165, 0.800  | 657.4  | -                 | -               | 0.28 $\pm$ 0.12  | -                | -                |
| 145     | Toluene                     | 285, 0.990  | 761.8  | 0.85 $\pm$ 0.15   | 0.35 $\pm$ 0.35 | 0.76 $\pm$ 0.11  | 0.40 $\pm$ 0.03  | 0.36 $\pm$ 0.04  |
| 146     | Ethylbenzene                | 408, 1.190  | 859.2  | 0.87 $\pm$ 0.04   | -               | -                | 0.05 $\pm$ 0.02  | 0.06 $\pm$ 0.01  |
| 147     | p-Xylene                    | 420, 1.200  | 866.3  | 10.74 $\pm$ 3.68  | 0.30 $\pm$ 0.20 | 8.22 $\pm$ 0.28  | 2.99 $\pm$ 0.33  | 2.77 $\pm$ 0.61  |
| 148     | 1,3-Dimethylbenzene         | 462, 1.270  | 891.3  | 4.11 $\pm$ 0.36   | -               | -                | 0.06 $\pm$ 0.02  | 0.04 $\pm$ 0.03  |
| 149     | o-Xylene                    | 468, 1.100  | 894.8  | 0.27 $\pm$ 0.20   | -               | -                | 0.06 $\pm$ 0.02  | -                |
| 150     | 1-Ethyl-4-methylbenzene     | 591, 1.270  | 962.5  | 0.54 $\pm$ 0.23   | -               | 0.35 $\pm$ 0.03  | 0.17 $\pm$ 0.05  | 0.10 $\pm$ 0.02  |
| 151     | 3-Ethyl-1-methylbenzene     | 603, 1.250  | 969.1  | 0.23 $\pm$ 0.05   | -               | 0.28 $\pm$ 0.02  | -                | -                |
| 152     | 1,2,4-Trimethylbenzene      | 648, 1.330  | 993.7  | 0.30 $\pm$ 0.01   | -               | 0.10 $\pm$ 0.02  | -                | -                |
| 153     | 1,2,3-Trimethylbenzene      | 705, 1.410  | 1024.5 | 0.60 $\pm$ 0.06   | -               | -                | -                | -                |
| 154     | p-Cymene                    | 708, 1.280  | 1026.0 | 0.15 $\pm$ 0.02   | -               | -                | -                | -                |
| 155     | 1-Methyl-3-propylbenzene    | 756, 1.300  | 1051.8 | 0.11 $\pm$ 0.00   | -               | -                | -                | -                |
| 156     | 1-Methyl-2-propylbenzene    | 771, 1.320  | 1059.9 | 0.08 $\pm$ 0.01   | -               | -                | -                | -                |
| 157     | 1,2-Dimethyl-4-ethylbenzene | 819, 1.370  | 1085.7 | 0.08 $\pm$ 0.03   | -               | -                | -                | -                |

|     |                                       |             |        |           |      |           |           |           |
|-----|---------------------------------------|-------------|--------|-----------|------|-----------|-----------|-----------|
| 158 | 1,2,3,4-Tetramethylbenzene            | 882, 1.440  | 1120.6 | 0.06±0.02 | -    | -         | -         | -         |
| 159 | Naphthalene                           | 996, 2.030  | 1185.4 | 0.58±0.09 | -    | 0.34±0.06 | 0.22±0.03 | 0.21±0.03 |
| 160 | 2-Methylnaphthalene                   | 1185, 2.000 | 1297.0 | 0.12±0.02 | -    | 0.10±0.02 | 0.04±0.00 | 0.04±0.01 |
| 161 | 1-Methylnaphthalene                   | 1212, 2.080 | 1314.2 | 0.05±0.01 | -    | 0.04±0.01 | 0.01±0.00 | 0.02±0.01 |
| 162 | 1-(1,5-Dimethylhexyl)-4-methylbenzene | 1422, 1.320 | 1452.0 | 0.09±0.02 | -    | -         | 0.03±0.00 | -         |
|     | Subtotal                              |             |        | 19.83     | 0.65 | 10.47     | 4.03      | 3.6       |

#### Aldehydes

|      |                        |             |        |            |           |           |            |            |
|------|------------------------|-------------|--------|------------|-----------|-----------|------------|------------|
| (28) |                        |             |        |            |           |           |            |            |
| 163  | Acetaldehyde           | 78, 2.100   | 417.2  | 23.71±8.76 | 5.01±2.71 | 4.81±1.91 | 13.10±3.36 | 10.19±5.33 |
| 164  | Butanal                | 120, 0.720  | 567.3  | 0.52±0.05  | 0.23±0.05 | 1.58±1.23 | 0.52±0.13  | 0.38±0.06  |
| 165  | (E)-2-Butenal          | 159, 0.910  | 648.1  | -          | -         | 0.60±0.71 | -          | -          |
| 166  | Pentanal               | 192, 0.910  | 700.2  | -          | 0.14±0.02 | 0.09±0.03 | 0.21±0.02  | -          |
| 167  | (E)-2-Methyl-2-butenal | 237, 1.120  | 738.8  | 0.28±0.10  | -         | -         | -          | -          |
| 168  | 3-Methyl-2-butenal     | 291, 1.340  | 787.7  | 0.04±0.01  | -         | 0.07±0.01 | 0.03±0.01  | -          |
| 169  | Hexanal                | 309, 1.160  | 800.2  | 12.46±8.42 | 5.63±0.77 | 2.07±0.16 | 2.68±0.48  | 2.78±0.05  |
| 170  | 3-Hexenal              | 312, 1.150  | 802.0  | -          | -         | -         | 0.10±0.05  | 0.17±0.02  |
| 171  | (Z)-2-hexenal          | 384, 1.310  | 846.7  | -          | -         | -         | 0.06±0.01  | 1.98±2.57  |
| 172  | (E)-2-Hexenal          | 393, 1.370  | 850.4  | 6.27±2.56  | 5.27±0.90 | 1.60±0.07 | 4.84±2.07  | 2.73±1.88  |
| 173  | Heptanal               | 480, 1.240  | 901.9  | -          | 0.03±0.01 | 0.07±0.01 | 0.08±0.02  | 0.04±0.01  |
| 174  | (E,E)-2,4-Hexadienal   | 495, 1.630  | 910.3  | 0.10±0.02  | 0.13±0.01 | -         | 0.06±0.00  | 0.10±0.02  |
| 175  | (E)-2-Heptenal         | 579, 1.420  | 957.7  | 0.03±0.01  | -         | 0.23±0.01 | 0.21±0.02  | 0.13±0.05  |
| 176  | Benzaldehyde           | 588, 1.910  | 961.2  | 0.29±0.04  | 0.04±0.01 | 0.25±0.10 | 0.08±0.00  | 0.08±0.01  |
| 177  | Octanal                | 666, 1.290  | 1003.5 | 0.27±0.13  | 0.04±0.01 | 0.34±0.15 | 0.24±0.12  | -          |
| 178  | (Z)-2-Octenal          | 717, 1.180  | 1030.8 | 0.38±0.25  | -         | 0.44±0.06 | 0.64±0.05  | 0.37±0.03  |
| 179  | Benzeneacetaldehyde    | 744, 2.040  | 1045.8 | 0.10±0.01  | -         | -         | -          | -          |
| 180  | (E)-2-Octenal          | 768, 1.450  | 1058.4 | 0.13±0.03  | 0.03±0.01 | 0.61±0.05 | 0.43±0.05  | 0.31±0.12  |
| 181  | Nonanal                | 855, 1.310  | 1105.3 | -          | 0.07±0.00 | -         | 1.14±0.55  | -          |
| 182  | (E,Z)-2,6-Nonadienal   | 942, 1.560  | 1154.6 | -          | -         | -         | 0.05±0.01  | -          |
| 183  | (E)-2-Nonenal          | 954, 1.450  | 1161.3 | -          | 0.06±0.02 | 0.88±0.18 | 1.10±0.80  | 0.53±0.28  |
| 184  | cis-4-Decenal          | 1014, 1.410 | 1195.2 | -          | -         | 0.08±0.03 | 0.04±0.00  | -          |
| 185  | Decanal                | 1032, 1.330 | 1205.6 | 0.05±0.01  | 0.02±0.00 | 0.09±0.02 | 0.04±0.00  | 0.04±0.01  |
| 186  | (E,E)-2,4-Nonadienal   | 1047, 1.630 | 1214.7 | -          | -         | 0.10±0.01 | 0.09±0.01  | 0.08±0.04  |
| 187  | 4-Methoxybenzaldehyde  | 1119, 2.420 | 1258.0 | -          | -         | -         | 0.02±0.00  | 0.05±0.01  |
| 188  | (Z)-2-Decenal          | 1128, 1.450 | 1262.8 | -          | -         | 0.02±0.00 | 0.01±0.00  | -          |
| 189  | Citral                 | 1143, 1.630 | 1271.8 | -          | -         | 0.05±0.01 | -          | -          |
| 190  | 2,4-Decadienal         | 1182, 1.550 | 1295.0 | -          | -         | 0.24±0.04 | 0.13±0.01  | 0.10±0.06  |
|      | Subtotal               |             |        | 44.63      | 16.7      | 14.22     | 25.90      | 20.06      |

#### Ketones

|     |                     |            |       |           |           |           |           |           |
|-----|---------------------|------------|-------|-----------|-----------|-----------|-----------|-----------|
| (8) |                     |            |       |           |           |           |           |           |
| 191 | Acetone             | 102, 0.600 | 500.3 | -         | 0.29±0.02 | 1.35±1.02 | -         | 1.12±0.99 |
| 192 | Methyl vinyl ketone | 120, 0.740 | 567.3 | 0.61±0.28 | -         | -         | -         | -         |
| 193 | 3-Octanone          | 636, 1.270 | 987.1 | 0.29±0.19 | -         | 0.34±0.02 | 0.35±0.04 | 0.13±0.02 |

|          |                                               |             |        |             |            |            |            |            |
|----------|-----------------------------------------------|-------------|--------|-------------|------------|------------|------------|------------|
| 194      | 6-Methyl-5-heptene-2-one                      | 639, 1.380  | 988.8  | 0.44±0.30   | 0.07±0.02  | 1.48±0.14  | 0.19±0.22  | 0.80±0.08  |
| 195      | Acetophenone                                  | 786, 2.040  | 1068.4 | 0.13±0.01   | -          | 0.20±0.02  | -          | -          |
| 196      | (E)-4-Phenylbut-3-en-2-one                    | 1200, 2.150 | 1306.5 | -           | -          | 0.03±0.00  | -          | -          |
| 197      | (E)-6,10-dimethyl-5,9-undecadien-2-one        | 1431, 1.500 | 1456.3 | -           | -          | 0.59±0.03  | 0.11±0.02  | 0.36±0.13  |
| 198      | 4,4-Dimethyl-3-phenyl-2,5-cyclohexadien-1-one | 1614, 1.830 | 1583.5 | 0.10±0.03   | -          | -          | 0.03±0.00  | -          |
|          | Subtotal                                      |             |        | 1.57        | 0.36       | 3.99       | 0.68       | 2.41       |
| Alcohols |                                               |             |        |             |            |            |            |            |
| (20)     |                                               |             |        |             |            |            |            |            |
| 199      | Ethanol                                       | 90, 0.600   | 456.0  | 26.06±10.27 | 12.34±1.25 | 27.35±8.83 | 24.15±7.38 | 16.15±5.27 |
| 200      | 1-Propanol                                    | 108, 0.670  | 522.7  | 0.42±0.19   | -          | 0.55±0.03  | 0.27±0.04  | 0.29±0.05  |
| 201      | 2-Methylpropanol                              | 144, 0.750  | 624.1  | -           | -          | -          | 0.18±0.03  | -          |
| 202      | 1-Butanol                                     | 159, 0.820  | 648.0  | 2.66±0.25   | 1.50±0.54  | 8.80±1.02  | 10.20±0.94 | 5.55±0.50  |
| 203      | 2-Methylbutanol                               | 234, 0.920  | 731.0  | 4.06±0.44   | 0.03±0.01  | 0.44±0.07  | 0.61±0.04  | 0.21±0.04  |
| 204      | 1-Pentanol                                    | 270, 0.990  | 766.9  | -           | 0.11±0.03  | 0.43±0.12  | 0.38±0.04  | 0.19±0.03  |
| 205      | 1-Hexanol                                     | 420, 1.180  | 866.3  | 9.84±7.29   | 11.26±2.67 | 26.97±4.90 | 14.30±1.13 | 13.31±2.54 |
| 206      | trans-2-Hexen-1-ol                            | 420, 1.210  | 866.3  | -           | 0.50±0.09  | -          | -          | -          |
| 207      | 1-Heptanol                                    | 606, 1.200  | 970.7  | 0.16±0.02   | 0.02±0.00  | 0.25±0.04  | 0.17±0.01  | 0.13±0.03  |
| 208      | 2-Ethylhexanol                                | 717, 1.190  | 1030.8 | -           | 0.06±0.03  | -          | -          | -          |
| 209      | 1-Octanol                                     | 792, 1.260  | 1071.2 | 0.57±0.18   | -          | 0.99±0.38  | 0.44±0.04  | 0.43±0.13  |
| 210      | 2-Nonanol                                     | 846, 1.200  | 1100.2 | -           | 0.08±0.02  | 0.19±0.05  | -          | -          |
| 211      | Linalool                                      | 846, 1.260  | 1100.2 | -           | -          | 0.05±0.00  | -          | -          |
| 212      | (E)-2-Nonen-1-ol                              | 969, 1.340  | 1171.4 | -           | -          | -          | 0.08±0.01  | -          |
| 213      | 1-Nonanol                                     | 972, 1.290  | 1169.7 | -           | -          | 0.25±0.08  | 0.23±0.06  | -          |
| 214      | 3,4,5-Trimethyl-4-heptanol                    | 1044, 1.380 | 1212.7 | 0.90±0.21   | -          | -          | -          | -          |
| 215      | Citronellol                                   | 1071, 1.370 | 1228.8 | -           | -          | 0.08±0.03  | 0.09±0.03  | 0.06±0.01  |
| 216      | (Z)-4-Decen-1-ol                              | 1119, 1.380 | 1257.4 | -           | -          | 0.03±0.01  | -          | -          |
| 217      | 1-Decanol                                     | 1143, 1.290 | 1271.6 | -           | -          | 0.05±0.00  | -          | -          |
| 218      | 2,3-Dihydrofarnesol                           | 1764, 1.460 | 1693.6 | -           | -          | -          | 0.09±0.02  | 0.07±0.02  |
|          | Subtotal                                      |             |        | 44.67       | 25.90      | 66.43      | 51.19      | 36.39      |
| Others   |                                               |             |        |             |            |            |            |            |
| (23)     |                                               |             |        |             |            |            |            |            |
| 219      | Dimethyl sulfide                              | 108, 0.600  | 522.4  | -           | 0.19±0.04  | -          | 0.53±0.51  | 0.23±0.08  |
| 220      | 2,3-Dihydrofuran                              | 120, 0.640  | 567.2  | 0.04±0.01   | 0.03±0.01  | -          | 0.10±0.01  | 0.16±0.04  |
| 221      | Acetic acid                                   | 123, 0.690  | 578.2  | -           | -          | -          | 0.06±0.01  | 0.07±0.00  |
| 222      | 2-Methylfuran                                 | 132, 0.690  | 609.7  | 0.48±0.50   | -          | 0.65±0.22  | -          | 0.11±0.04  |
| 223      | Thioacetic acid                               | 213, 0.680  | 718.0  | 1.40±0.13   | -          | -          | -          | -          |
| 224      | Anisole                                       | 507, 1.550  | 918.4  | 0.02±0.00   | -          | 0.05±0.01  | 0.03±0.00  | 0.03±0.01  |
| 225      | Benzonitrile                                  | 633, 2.050  | 987.5  | 0.23±0.02   | -          | 0.38±0.08  | -          | -          |
| 226      | Phenol                                        | 639, 1.610  | 993.8  | 0.07±0.01   | -          | 0.10±0.03  | -          | 0.04±0.00  |
| 227      | 2-Pentylfuran                                 | 645, 1.160  | 993.6  | 0.26±0.04   | 0.33±0.07  | 4.86±0.32  | 4.45±0.88  | 2.61±0.39  |
| 228      | 1-Methoxy-4-methylbenzen                      | 702, 1.580  | 1023.0 | -           | -          | 0.06±0.01  | 0.03±0.00  | 0.05±0.02  |

e

|     |                                             |             |        |           |        |           |           |           |
|-----|---------------------------------------------|-------------|--------|-----------|--------|-----------|-----------|-----------|
| 229 | Eucalyptol                                  | 720, 1.230  | 1032.4 | 0.89±0.49 | -      | -         | -         | -         |
| 230 | 1-Methoxymethyl-2-methyl benzene            | 831, 1.640  | 1092.3 | -         | -      | 0.05±0.00 | -         | -         |
| 231 | (Z)-Rose oxide                              | 867, 1.290  | 1112.1 | -         | -      | -         | 0.06±0.01 | 0.03±0.00 |
| 232 | (E)-Rose oxide                              | 897, 1.310  | 1129.0 | -         | -      | -         | 0.05±0.00 | -         |
| 233 | β-Citronellol, methyl ether                 | 984, 1.140  | 1178.1 | -         | -      | -         | 0.11±0.01 | 0.06±0.02 |
| 234 | Estragole                                   | 1023, 1.730 | 1200.5 | 2.03±0.45 | -      | 0.41±0.20 | 0.02±0.00 | 0.07±0.02 |
| 235 | (Z)-1-Methoxy-4-(prop-1-en-1-yl)benzene     | 1116, 1.810 | 1255.9 | 0.02±0.00 | -      | -         | -         | -         |
| 236 | Anethole                                    | 1170, 1.870 | 1288.0 | 0.11±0.01 | -      | 0.03±0.02 | 0.02±0.00 | 0.02±0.00 |
| 237 | (E)-3-Octenoic acid                         | 1320, 1.350 | 1382.9 | -         | -      | -         | 0.11±0.01 | 0.08±0.02 |
| 238 | Methyleugenol                               | 1359, 1.990 | 1408.7 | 0.09±0.02 | -      | 0.66±0.16 | -         | -         |
| 239 | (Z)-1,2-Dimethoxy-4-(prop-1-en-1-yl)benzene | 1497, 2.100 | 1500.8 | -         | -      | 0.05±0.02 | -         | -         |
| 240 | Sesquirosefuran                             | 1578, 1.440 | 1557.7 | -         | -      | 0.09±0.01 | 0.06±0.00 | 0.05±0.03 |
| 241 | (E)-3-(4,8-Dimethylnona-3,7-dien-1-yl)furan | 1605, 1.420 | 1576.9 | -         | -      | 0.09±0.03 | 0.40±0.04 | 0.22±0.04 |
|     | Subtotal                                    |             |        | 5.64      | 0.55   | 7.48      | 6.03      | 3.83      |
|     | Total                                       |             |        | 838.12    | 208.45 | 511.87    | 379.72    | 328.02    |

<sup>1</sup>R.T. refers to the retention time. <sup>2</sup>RI refers to the calculated retention index. <sup>3</sup>Data are means±SD of three replications. <sup>4</sup>"-" represents no data.

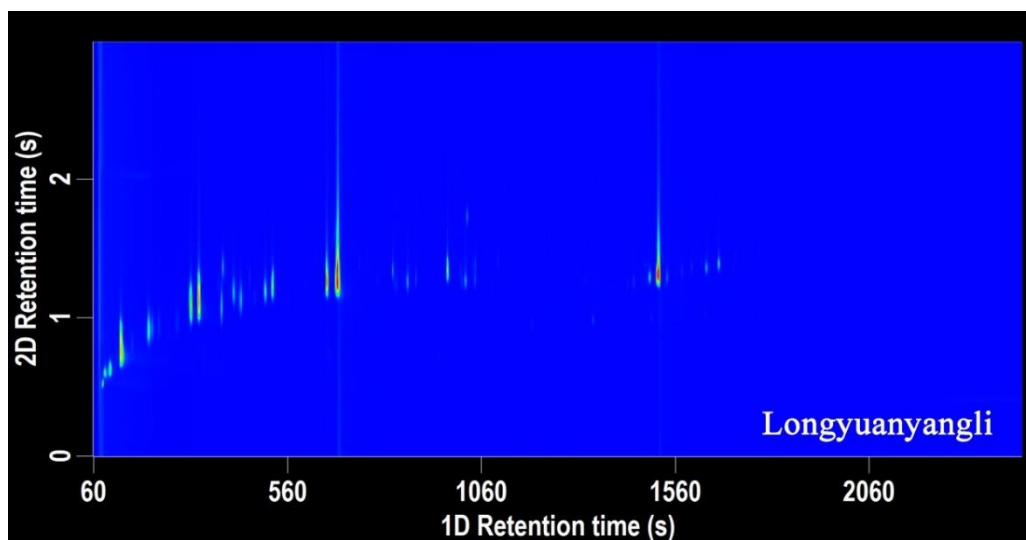

Figure S1. 2D chromatogram (total ion chromatography) of Longyuanyangli.



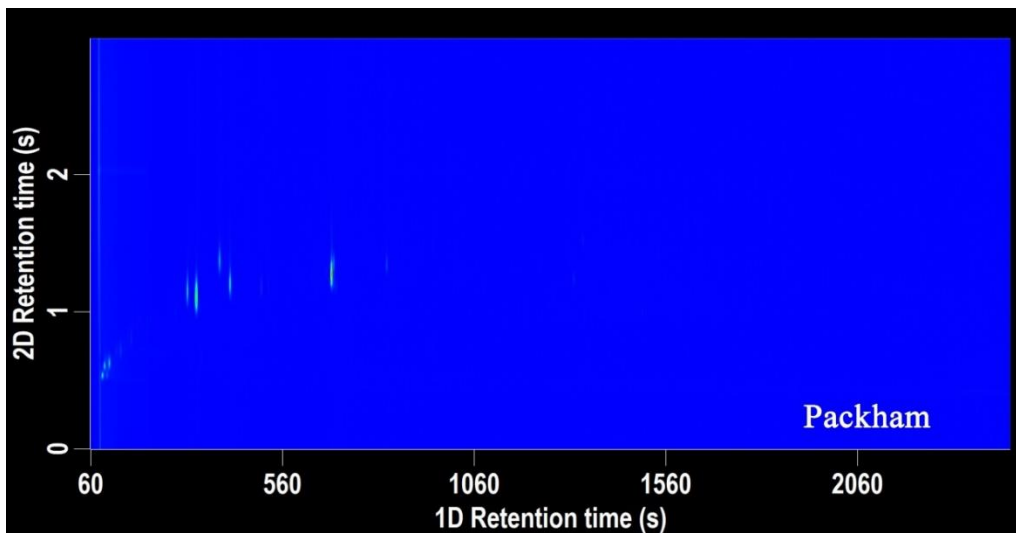

Figure S2. 2D chromatogram (total ion chromatography) of Packham.

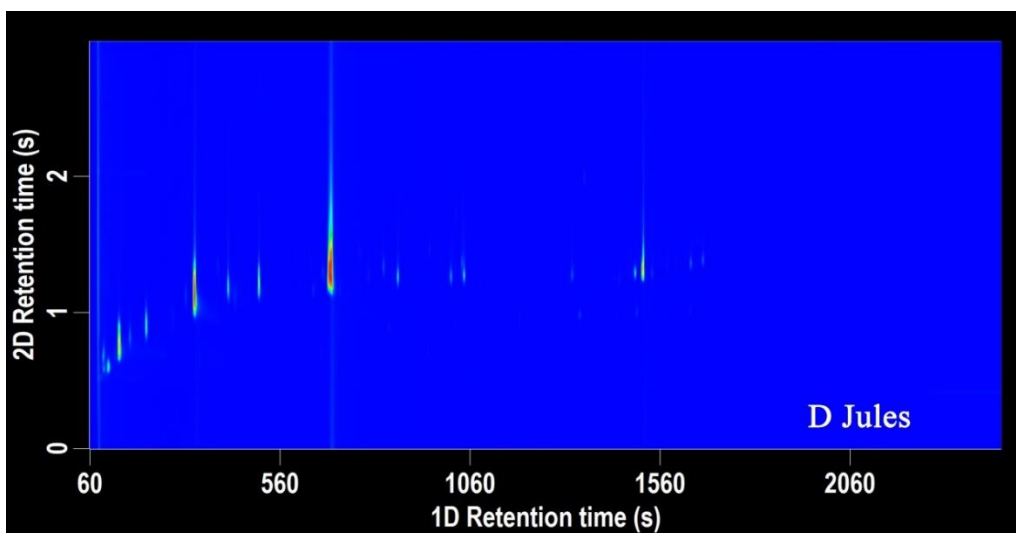

Figure S3. 2D chromatogram (total ion chromatography) of D Jules.

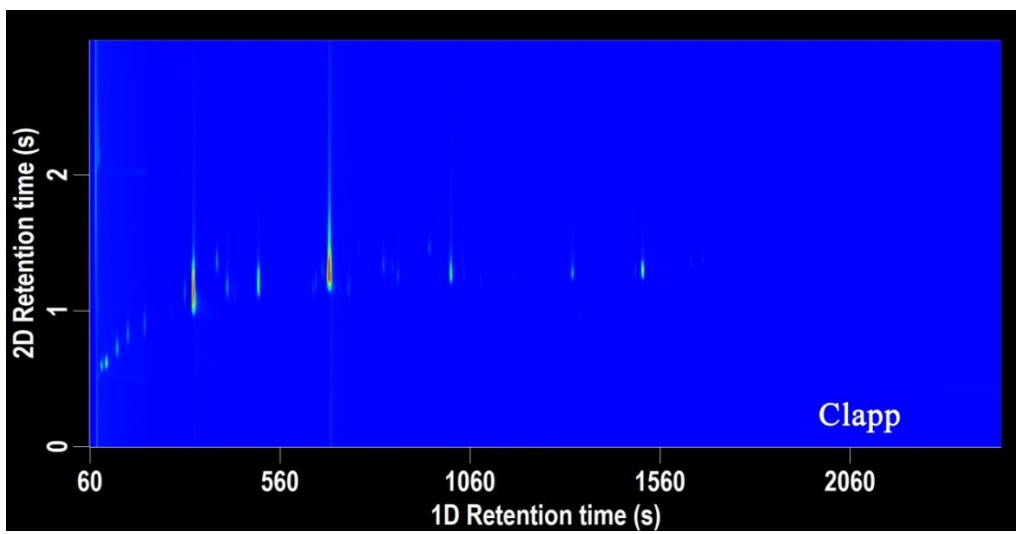

Figure S4. 2D chromatogram (total ion chromatography) of Clapp.

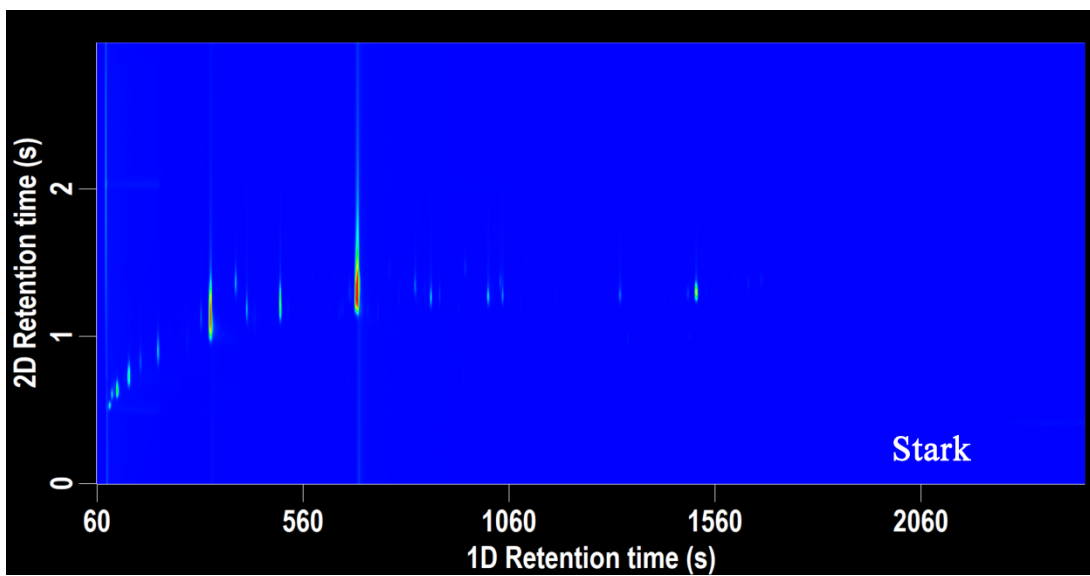

Figure S5. 2D chromatogram (total ion chromatography) of Stark.
